# Supplementary material for: Nanostructured intermetallic InSb as a high-capacity and high-performance negative electrode for sodium-ion batteries
Source: Royal Society of Chemistry journal article supplement (doi:10.1039/d1se00386k), 2021-01-01
Supplement: d1se00386k1.pdf [file d1se00386k1.pdf]

# Nanostructured intermetallic InSb as a new high capacity and high-performance negative electrode for sodium-ion batteries

*Irshad Mohammad<sup>\*†</sup>, Lucie Blondeau<sup>†</sup>, Eddy Foy<sup>§</sup>, Jocelyne Leroy<sup>‡</sup>, Eric Leroy<sup>⊥</sup>, Hicham Khodja<sup>†</sup>, Magali Gauthier<sup>\*†</sup>*

<sup>†</sup> Université Paris-Saclay, CEA, CNRS, NIMBE, LEEL, 91191, Gif-sur-Yvette, France

<sup>§</sup> Université Paris-Saclay, CEA, CNRS, NIMBE, LAPA-IRAMAT, 91191 Gif-sur-Yvette, France

<sup>‡</sup> Université Paris-Saclay, CEA, CNRS, NIMBE, LICSEN, 91191 Gif-sur-Yvette, France

<sup>⊥</sup> Université Paris Est Créteil, CNRS, ICMPE, UMR 7182, 2 rue Henri Dunant, 94320 Thiais, France

\* Corresponding authors: [irshad.mohammad@cea.fr](mailto:irshad.mohammad@cea.fr); [magali.gauthier@cea.fr](mailto:magali.gauthier@cea.fr)

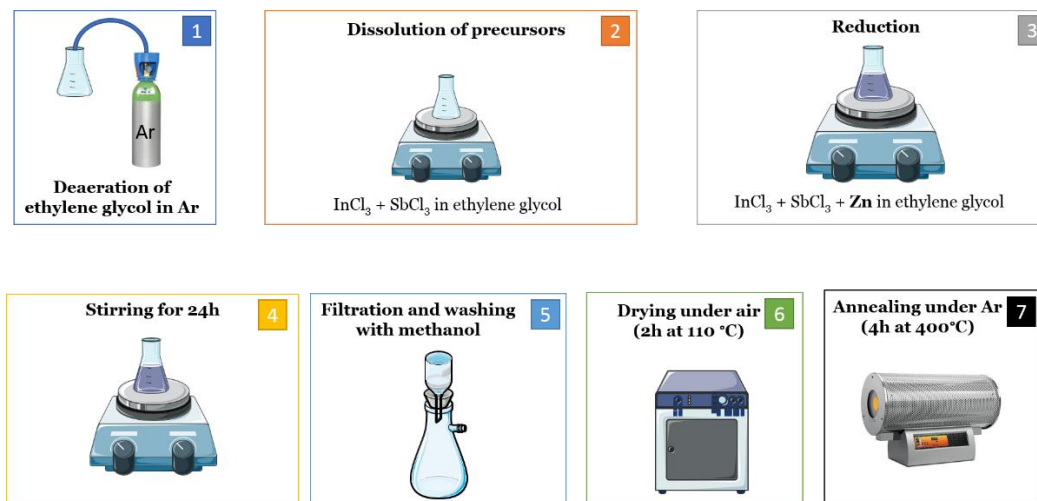

Figure S1. Schematic description of the reduction synthesis process for the InSb or Sb powders.

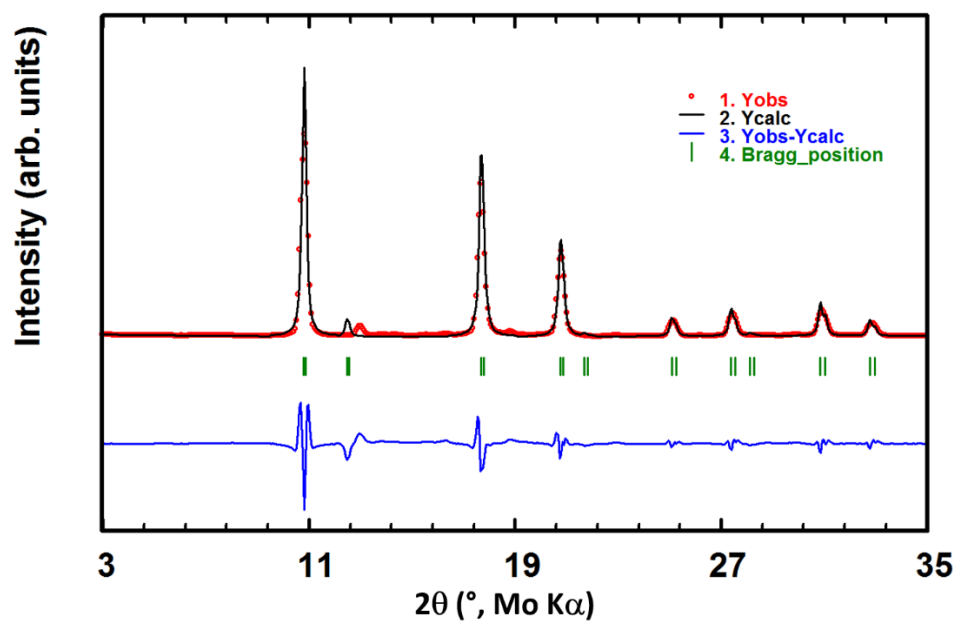

Figure S2. Observed and calculated XRD patterns of as-prepared InSb.

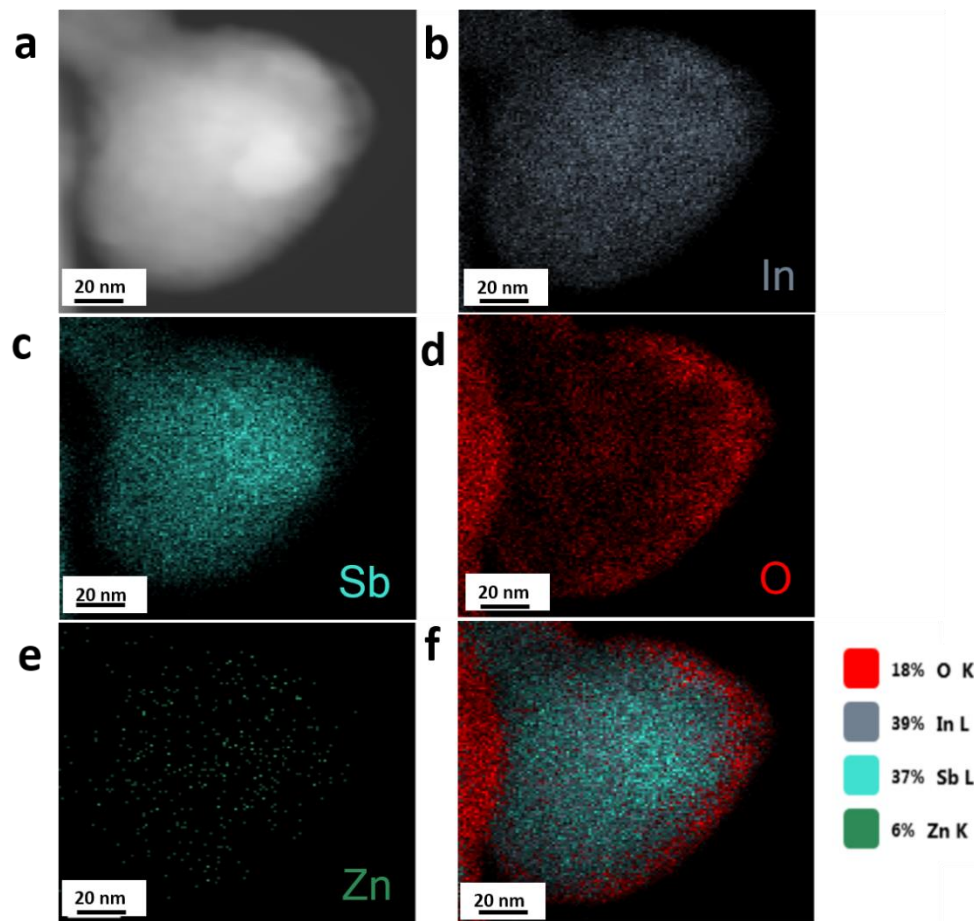

**Figure S3.** EDX images of the nanostructured InSb powder. (a) electron image and (b-f) the corresponding elemental mapping images of O, In, Sb and Zn. The corresponding atomic percentages of elements are given in (f).

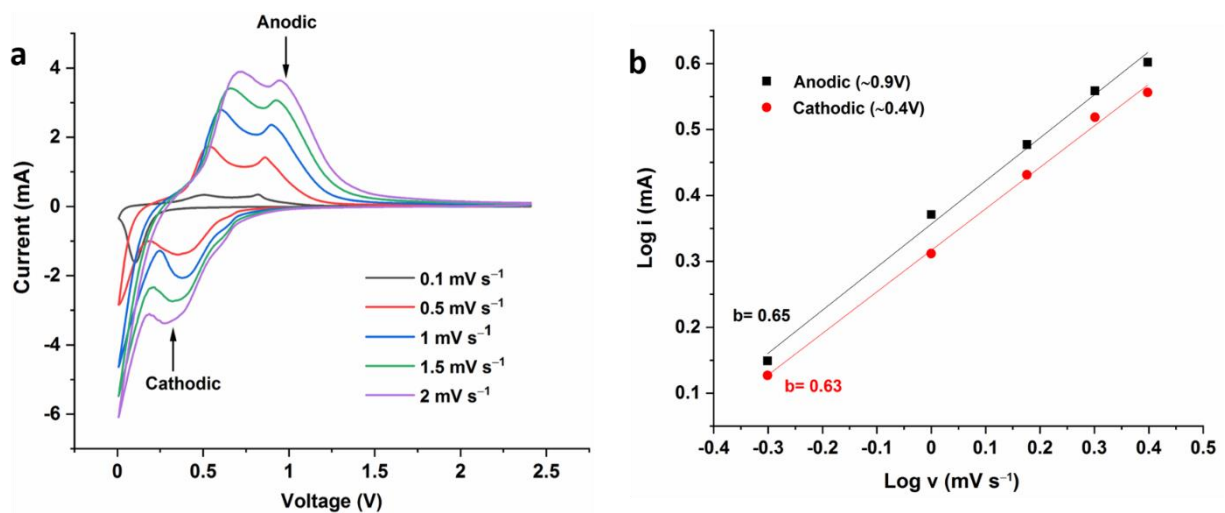

**Figure S4.** (a) CV curves of the InSb electrode upon reaction with sodium at different scan rates. (b) Relationship of the InSb anodic and cathodic peaks against the scan rate to determine  $b$  values.

**Table S1.** Comparison of the performance of alloy-based materials with the performance of nanostructured InSb obtained in this study.

| Anode Materials                                   | 1 <sup>st</sup> charge capacity (mAh g <sup>-1</sup> ) | Current Density (mA g <sup>-1</sup> ) | Cycle life (mAh g <sup>-1</sup> )                   | Synthesis method            | Ref.       |
|---------------------------------------------------|--------------------------------------------------------|---------------------------------------|-----------------------------------------------------|-----------------------------|------------|
| Crystalline Sb                                    | 537                                                    | 0.5C                                  | 576 (80 <sup>th</sup> )                             | Ball milling                | [1]        |
| Sb-C                                              | 559                                                    | 0.1C                                  | 430 (195 <sup>th</sup> )                            | Chemical route              | [2]        |
| Sb-C nanofibers                                   | 632                                                    | 40                                    | 446 (400 <sup>th</sup> )                            | Electrospinning             | [3]        |
| Sb/N-C nanosheets                                 | 340                                                    | 50                                    | 305 (60 <sup>th</sup> )                             | Sol-gel route               | [4]        |
| Sb hollow nanospheres                             | 645                                                    | 50                                    | 622 (50 <sup>th</sup> )                             | Galvanic replacement        | [5]        |
| AlSb film                                         | 450                                                    | 0.16C                                 | 250 (50 <sup>th</sup> )                             | Magnetron sputtering        | [6]        |
| SnSb/C nanocomposite                              | 544                                                    | 100                                   | 435 (80 <sup>th</sup> )                             | High energy ball milling    | [7]        |
| Sb <sub>2</sub> O <sub>3</sub>                    | 331                                                    | 500                                   | 414 (200 <sup>th</sup> )                            | Electro Spray Deposition    | [8]        |
| Sb <sub>2</sub> S <sub>3</sub> -graphite          | 662                                                    | 1000                                  | 665 (100 <sup>th</sup> )                            | High energy ball milling    | [9]        |
| Nanoporous Bi-Sb                                  | 551                                                    | 200                                   | 257 (200 <sup>th</sup> )                            | Chemical dealloying         | [10]       |
| Sb <sub>2</sub> S <sub>5</sub>                    | 845                                                    | 100                                   | 774 (300 <sup>th</sup> )                            | Hydrothermal method         | [11]       |
| Sb-Si                                             | 585                                                    | 200                                   | 663 (140 <sup>th</sup> )                            | Cosputtering                | [12]       |
| Sn-Ge-Sb                                          | 833                                                    | 85                                    | 662 (50 <sup>th</sup> )                             | Cosputtering                | [13]       |
| Mo <sub>3</sub> Sb <sub>7</sub>                   | 400                                                    | 0.2C                                  | 338 (800 <sup>th</sup> ) at 0.5C                    | Solid-state synthesis       | [14]       |
| Ni-Sb                                             | 632                                                    | 60                                    | 500 (70 <sup>th</sup> )                             | Chemical synthesis          | [15]       |
| FeSb-TiC-C nanocomposite                          | 215                                                    | 100                                   | 210 (60 <sup>th</sup> )                             | High energy ball milling    | [16]       |
| 3D porous Sb-Co composite                         | 718                                                    | 60                                    | 578 (50 <sup>th</sup> )                             | Reduction precipitation     | [17]       |
| β-SnSb film                                       | 700                                                    | 200                                   | 470 (150 <sup>th</sup> )                            | Sputtering                  | [18]       |
| Zn <sub>4</sub> Sb <sub>3</sub> thin films        | 474                                                    | 0.2C                                  | 394 (100 <sup>th</sup> )                            | Electrodeposition           | [19]       |
| Nanostructured Sb <sub>2</sub> Te <sub>3</sub> -C | 410                                                    | 50                                    | 373 (50 <sup>th</sup> )                             | Solid-state synthesis       | [20]       |
| Sb@Co(OH) <sub>2</sub> nanosheet                  | 973                                                    | 200                                   | 749 (200 <sup>th</sup> )                            | Magnetron sputtering        | [21]       |
| Sn(10)-Bi(10)-Sb(80)                              | 621                                                    | 200                                   | 614 (100 <sup>th</sup> )                            | Sputtering                  | [22]       |
| In-Sb-S framework                                 | 543                                                    | 50                                    | 330 (50 <sup>th</sup> )                             | Surfactant-thermal strategy | [23]       |
| InSb                                              | 287                                                    | 50                                    | 400 (250 <sup>th</sup> )                            | Mechanical alloying         | [24]       |
| Nanostructured InSb                               | 440<br>361                                             | 0.2C<br>(110)<br>C (570)              | 450 (50 <sup>th</sup> )<br>360 (100 <sup>th</sup> ) | Chemical reduction          | *This work |

**Table S2.** Theoretical volume expansion ( $\Delta V$ ) of binary Na–M compounds calculated by Vegard’s law [25]. The molar volume occupies by Na in the Na–M alloys is  $V=18.2 \text{ mL mol}^{-1}$  [26].

| Element   | Density ( $\text{g}\cdot\text{cm}^{-3}$ ) | $V_{\text{Element}} [\text{mL}\cdot\text{mol}^{-1}]$ | Reduction Product           | $V_{\text{Reduction Product}} [\text{mL}\cdot\text{mol}^{-1}]$ | $\Delta V [\%]$ |
|-----------|-------------------------------------------|------------------------------------------------------|-----------------------------|----------------------------------------------------------------|-----------------|
| Si        | 2.33                                      | 12.05                                                | NaSi                        | 30.25                                                          | ~ 150           |
| Ge        | 5.32                                      | 13.65                                                | NaGe                        | 31.85                                                          | ~ 130           |
| Sn        | 7.29                                      | 16.28                                                | $\text{Na}_{15}\text{Sn}_4$ | 84.53                                                          | ~ 420           |
| Pb        | 11.35                                     | 18.25                                                | $\text{Na}_{15}\text{Pb}_4$ | 72.85                                                          | ~ 300           |
| P (Black) | 2.34                                      | 13.17                                                | $\text{Na}_3\text{P}$       | 67.83                                                          | ~ 410           |
| Sb        | 6.70                                      | 18.17                                                | $\text{Na}_3\text{Sb}$      | 72.51                                                          | ~ 300           |
| In        | 8.31                                      | 15.70                                                | NaIn                        | 33.90                                                          | ~ 115           |
| Bi        | 7.31                                      | 21.36                                                | $\text{Na}_3\text{Bi}$      | 75.96                                                          | ~ 250           |
| As        | 5.72                                      | 13.08                                                | $\text{Na}_3\text{As}$      | 67.68                                                          | ~ 420           |

## References

- [1] A. Darwiche, C. Marino, M. T. Sougrati, B. Fraisse, L. Stievano, and L. Monconduit, “Better Cycling Performances of Bulk Sb in Na-Ion Batteries Compared to Li-Ion Systems: An Unexpected Electrochemical Mechanism,” *J. Am. Chem. Soc.*, vol. 134, no. 51, pp. 20805–20811, Dec. 2012, doi: 10.1021/ja310347x.
- [2] X.-M. Pham *et al.*, “A self-encapsulated porous Sb–C nanocomposite anode with excellent Na-ion storage performance,” *Nanoscale*, vol. 10, no. 41, pp. 19399–19408, Oct. 2018, doi: 10.1039/C8NR06182C.
- [3] L. Wu *et al.*, “Sb–C nanofibers with long cycle life as an anode material for high-performance sodium-ion batteries,” *Energy Environ. Sci.*, vol. 7, no. 1, pp. 323–328, Dec. 2013, doi: 10.1039/C3EE42944J.
- [4] X. Zhou, Y. Zhong, M. Yang, M. Hu, J. Wei, and Z. Zhou, “Sb nanoparticles decorated N-rich carbon nanosheets as anode materials for sodium ion batteries with superior rate capability and long cycling stability,” *Chem. Commun.*, vol. 50, no. 85, pp. 12888–12891, Sep. 2014, doi: 10.1039/C4CC05989A.
- [5] S. Qiu, X. Wu, L. Xiao, X. Ai, H. Yang, and Y. Cao, “Antimony Nanocrystals Encapsulated in Carbon Microspheres Synthesized by a Facile Self-Catalyzing Solvothermal Method for High-Performance Sodium-Ion Battery Anodes,” *ACS Appl. Mater. Interfaces*, vol. 8, no. 2, pp. 1337–1343, Jan. 2016, doi: 10.1021/acsami.5b10182.

- [6] L. Baggetto, M. Marszewski, J. Górka, M. Jaroniec, and G. M. Veith, "AlSb thin films as negative electrodes for Li-ion and Na-ion batteries," *Journal of Power Sources*, vol. 243, pp. 699–705, Dec. 2013, doi: 10.1016/j.jpowsour.2013.06.074.
- [7] Y. Zhao and A. Manthiram, "High-Capacity, High-Rate Bi–Sb Alloy Anodes for Lithium-Ion and Sodium-Ion Batteries," *Chem. Mater.*, vol. 27, no. 8, pp. 3096–3101, Apr. 2015, doi: 10.1021/acs.chemmater.5b00616.
- [8] M. Hu, Y. Jiang, W. Sun, H. Wang, C. Jin, and M. Yan, "Reversible conversion-alloying of Sb<sub>2</sub>O<sub>3</sub> as a high-capacity, high-rate, and durable anode for sodium ion batteries," *ACS Appl Mater Interfaces*, vol. 6, no. 21, pp. 19449–19455, Nov. 2014, doi: 10.1021/am505505m.
- [9] Y. Zhao and A. Manthiram, "Amorphous Sb<sub>2</sub>S<sub>3</sub> embedded in graphite: a high-rate, long-life anode material for sodium-ion batteries," *Chem. Commun.*, vol. 51, no. 67, pp. 13205–13208, Aug. 2015, doi: 10.1039/C5CC03825A.
- [10] H. Gao, J. Niu, C. Zhang, Z. Peng, and Z. Zhang, "A Dealloying Synthetic Strategy for Nanoporous Bismuth–Antimony Anodes for Sodium Ion Batteries," *ACS Nano*, vol. 12, no. 4, pp. 3568–3577, Apr. 2018, doi: 10.1021/acsnano.8b00643.
- [11] Y. Lu *et al.*, "High-Capacity and Ultrafast Na-Ion Storage of a Self-Supported 3D Porous Antimony Persulfide–Graphene Foam Architecture," *Nano Lett.*, vol. 17, no. 6, pp. 3668–3674, Jun. 2017, doi: 10.1021/acs.nanolett.7b00889.
- [12] W. P. Kalisvaart, B. C. Olsen, E. J. Lubner, and J. M. Buriak, "Sb–Si Alloys and Multilayers for Sodium-Ion Battery Anodes," *ACS Appl. Energy Mater.*, vol. 2, no. 3, pp. 2205–2213, Mar. 2019, doi: 10.1021/acsaem.8b02231.
- [13] B. Farbod *et al.*, "Anodes for Sodium Ion Batteries Based on Tin–Germanium–Antimony Alloys," *ACS Nano*, vol. 8, no. 5, pp. 4415–4429, May 2014, doi: 10.1021/nn4063598.
- [14] W. Li *et al.*, "Carbon-coated Mo<sub>3</sub>Sb<sub>7</sub> composite as anode material for sodium ion batteries with long cycle life," *Journal of Power Sources*, vol. 307, pp. 173–180, Mar. 2016, doi: 10.1016/j.jpowsour.2015.12.121.
- [15] J. Liu, Z. Yang, J. Wang, L. Gu, J. Maier, and Y. Yu, "Three-dimensionally interconnected nickel–antimony intermetallic hollow nanospheres as anode material for high-rate sodium-ion batteries," *Nano Energy*, vol. 16, pp. 389–398, Sep. 2015, doi: 10.1016/j.nanoen.2015.07.020.
- [16] I. T. Kim, E. Allcorn, and A. Manthiram, "High-performance FeSb–TiC–C nanocomposite anodes for sodium-ion batteries," *Phys. Chem. Chem. Phys.*, vol. 16, no. 25, pp. 12884–12889, Jun. 2014, doi: 10.1039/C4CP01240B.
- [17] Y. Zhang *et al.*, "3D porous Sb-Co nanocomposites as advanced anodes for sodium-ion batteries and potassium-ion batteries," *Applied Surface Science*, vol. 499, p. 143907, Jan. 2020, doi: 10.1016/j.apsusc.2019.143907.
- [18] H. Xie *et al.*, "β-SnSb for Sodium Ion Battery Anodes: Phase Transformations Responsible for Enhanced Cycling Stability Revealed by In Situ TEM," *ACS Energy Lett.*, vol. 3, no. 7, pp. 1670–1676, Jul. 2018, doi: 10.1021/acsenerylett.8b00762.
- [19] E. D. Jackson, S. Green, and A. L. Prieto, "Electrochemical Performance of Electrodeposited Zn<sub>4</sub>Sb<sub>3</sub> Films for Sodium-Ion Secondary Battery Anodes," *ACS Appl. Mater. Interfaces*, vol. 7, no. 14, pp. 7447–7450, Apr. 2015, doi: 10.1021/am507436u.
- [20] K.-H. Nam, J.-H. Choi, and C.-M. Park, "Highly Reversible Na-Ion Reaction in Nanostructured Sb<sub>2</sub>Te<sub>3</sub>-C Composites as Na-Ion Battery Anodes," *J. Electrochem. Soc.*, vol. 164, no. 9, p. A2056, Jul. 2017, doi: 10.1149/2.1161709jes.

- [21] “Scalable Fabrication of Core–Shell Sb@Co(OH)<sub>2</sub> Nanosheet Anodes for Advanced Sodium-Ion Batteries via Magnetron Sputtering | ACS Nano.” <https://pubs.acs.org/doi/abs/10.1021/acsnano.8b07227> (accessed Jan. 04, 2021).
- [22] H. Xie, W. P. Kalisvaart, B. C. Olsen, E. J. Lubber, D. Mitlin, and J. M. Buriak, “Sn–Bi–Sb alloys as anode materials for sodium ion batteries,” *J. Mater. Chem. A*, vol. 5, no. 20, pp. 9661–9670, May 2017, doi: 10.1039/C7TA01443K.
- [23] L. Nie *et al.*, “Crystalline In–Sb–S framework for highly-performed lithium/sodium storage,” *J. Mater. Chem. A*, vol. 5, no. 27, pp. 14198–14205, Jul. 2017, doi: 10.1039/C7TA03334F.
- [24] “Reaction Mechanism of Indium Antimonide as a Sodium Storage Material | Crystal Growth & Design.” <https://pubs.acs.org/doi/10.1021/acs.cgd.0c01045> (accessed Apr. 27, 2021).
- [25] T. T. Tran and M. N. Obrovac, “Alloy Negative Electrodes for High Energy Density Metal-Ion Cells,” *J. Electrochem. Soc.*, vol. 158, no. 12, p. A1411, Nov. 2011, doi: 10.1149/2.083112jes.
- [26] V. L. Chevrier and G. Ceder, “Challenges for Na-ion Negative Electrodes,” *J. Electrochem. Soc.*, vol. 158, no. 9, p. A1011, Jul. 2011, doi: 10.1149/1.3607983.
